1 **Local differences in neuronal activation level decorrelate spatially coherent**  
2 **global fluctuations in gamma rhythms**

3 **Kaushik J. Lakshminarasimhan<sup>1,2</sup>, Nikos K. Logothetis<sup>1,3</sup>, Georgios A. Keliris<sup>1,4,5</sup>**

4 <sup>1</sup> Max-Planck Institute for Biological Cybernetics, Tübingen 72076, Germany

5 <sup>2</sup> Dept. of Neuroscience, Baylor College of Medicine, Houston, TX 77030, USA

6 <sup>3</sup> Centre for Imaging Sciences, University of Manchester, Manchester M13 9PT, UK

7 <sup>4</sup> Bernstein Center for Computational Neuroscience, Tübingen 72076, Germany

8 <sup>5</sup> Bio-Imaging Lab, University of Antwerp, Universiteitsplein 1, 2610 Wilrijk, Belgium

9 **Corresponding author**

10 Georgios A. Keliris, Email: [georgios.keliris@tuebingen.mpg.de](mailto:georgios.keliris@tuebingen.mpg.de)

11 **Abstract**

12 Neuronal coherence is thought to constitute a unique substrate for information transmission  
13 distinct from firing rate. However, since the spatial scale of extracellular oscillations typically  
14 exceeds that of firing rates, it is unclear whether coherence complements or compromises the  
15 rate code. We examined responses in the macaque primary visual cortex and found that  
16 fluctuations in gamma-band (~40Hz) neuronal coherence correlated more with firing rate than  
17 oscillations in the local-field-potential (LFP). Although the spatial extent of LFP rhythms was  
18 broader, that of neuronal coherence was indistinguishable from firing rates. To identify the  
19 mechanism, we developed a statistical technique to isolate the rhythmic component of the  
20 spiking process and found that above results are explained by an activation-dependent increase in  
21 neuronal sensitivity to gamma-rhythmic input. Such adaptive changes in sensitivity to rhythmic  
22 inputs might constitute a fundamental homeostatic mechanism that prevents globally coherent  
23 inputs from undermining spatial resolution of the neural code.

24 Sensory neurons often exhibit changes in coherence in addition to firing rates, providing distinct  
25 substrates for representing information. Although the precise behavioral consequences of  
26 differences in the timescales of these two codes continue to be debated<sup>1-3</sup>, recent work suggests  
27 that they may operate in parallel to constitute a multiplexed temporal code<sup>4</sup>. A related but often  
28 overlooked issue is the compatibility of their spatial scales. Whereas spatially correlated firing is  
29 detrimental to the information capacity of rate codes, it is a defining aspect of synchrony-based  
30 codes. Entrainment of spikes from distinct columns can undermine the spatial resolution of the  
31 representation established by differences in firing rates.

32 Neuronal coherence in the gamma frequency range (30-90 Hz) is ubiquitous in the  
33 mammalian brain and has been implicated in a variety of functions including sensory  
34 processing<sup>5-7</sup>, attentional selection<sup>8,9</sup>, perceptual modulation<sup>10,11</sup>, working memory<sup>12</sup>, memory  
35 encoding and retrieval<sup>13</sup> as well as neurological disorders like Schizophrenia and Parkinson's  
36 disease<sup>14,15</sup>. Gamma oscillations are thought to be generated locally within the cortical  
37 microcircuit<sup>16,17</sup> and have been reported to span hundreds of micrometers in the macaque brain.  
38 How does the spatial extent of gamma-band coherence compare to that of firing rates? What  
39 mechanisms, if any, help prevent global fluctuations in rhythms from compromising the integrity  
40 of the columnar organization?

41 To address these questions, we used multi-tetrode recordings to examine concurrent  
42 changes in spiking activity of single-units, local field potentials (LFP), and spike-field coherence  
43 (SFC) in the primary visual cortex of two rhesus macaques viewing monocularly presented  
44 gratings. Since the average synaptic activity is thought to be a major source of fluctuations in the  
45 LFP<sup>18-20</sup>, we expected the strength of LFP oscillations to best predict changes in the extent of  
46 synchronous firing estimated using SFC. In contrast, we found that gamma-band SFC was  
47 correlated more strongly with firing rate than strength of gamma rhythms in the LFP. We probed  
48 the underlying mechanism by partitioning the spiking process into two components – an  
49 asynchronous component that reflected stimulus-dependent changes in activation level, and a  
50 synchronous component driven by gamma oscillations in the LFP. We found that sensitivity of  
51 neurons to synchronous drive increased significantly with mean activity, and these changes  
52 specifically contributed to the stronger correlations between neuronal synchrony and firing rates.  
53 Such activity-dependent changes in sensitivity might constitute a fundamental mechanism that  
54 preserves the spatial resolution of the neural code by selectively entraining only highly activated  
55 neurons thus effectively decorrelating global, non-specific fluctuations in gamma rhythms.

## 56 **Results**

### 57 **Single-unit spike-field coherence (SFC) in the gamma band**

58 We recorded from 474 sites from two macaque monkeys viewing monocularly presented grating  
59 stimuli (**Methods M1 & M2**). A total of 811 single-units were isolated, among which ~75%  
60 ( $n=610/811$ ) were deemed visually responsive (**Methods M3**). For each responsive unit,  
61 neuronal coherence was assessed by estimating spike-field coherences (SFC) between their spike  
62 trains and concurrently recorded field potentials (LFP) (**Methods M3 – Equation 1**). The  
63 response of a representative single-unit is shown in **Figure 1A**. The onset of the stimulus is  
64 accompanied by a sharp transient increase in the firing rate followed by a period of relatively  
65 sustained firing. As seen from the spike-field coherogram, there was a significant increase in  
66 coherence in the gamma range (30-45 Hz) following stimulus onset and this was most  
67 pronounced during the sustained period of neuronal firing (400-1000ms). Therefore, we confined  
68 all our analyses to this time window. Stimulus-evoked spiking activities of approximately 27%

69

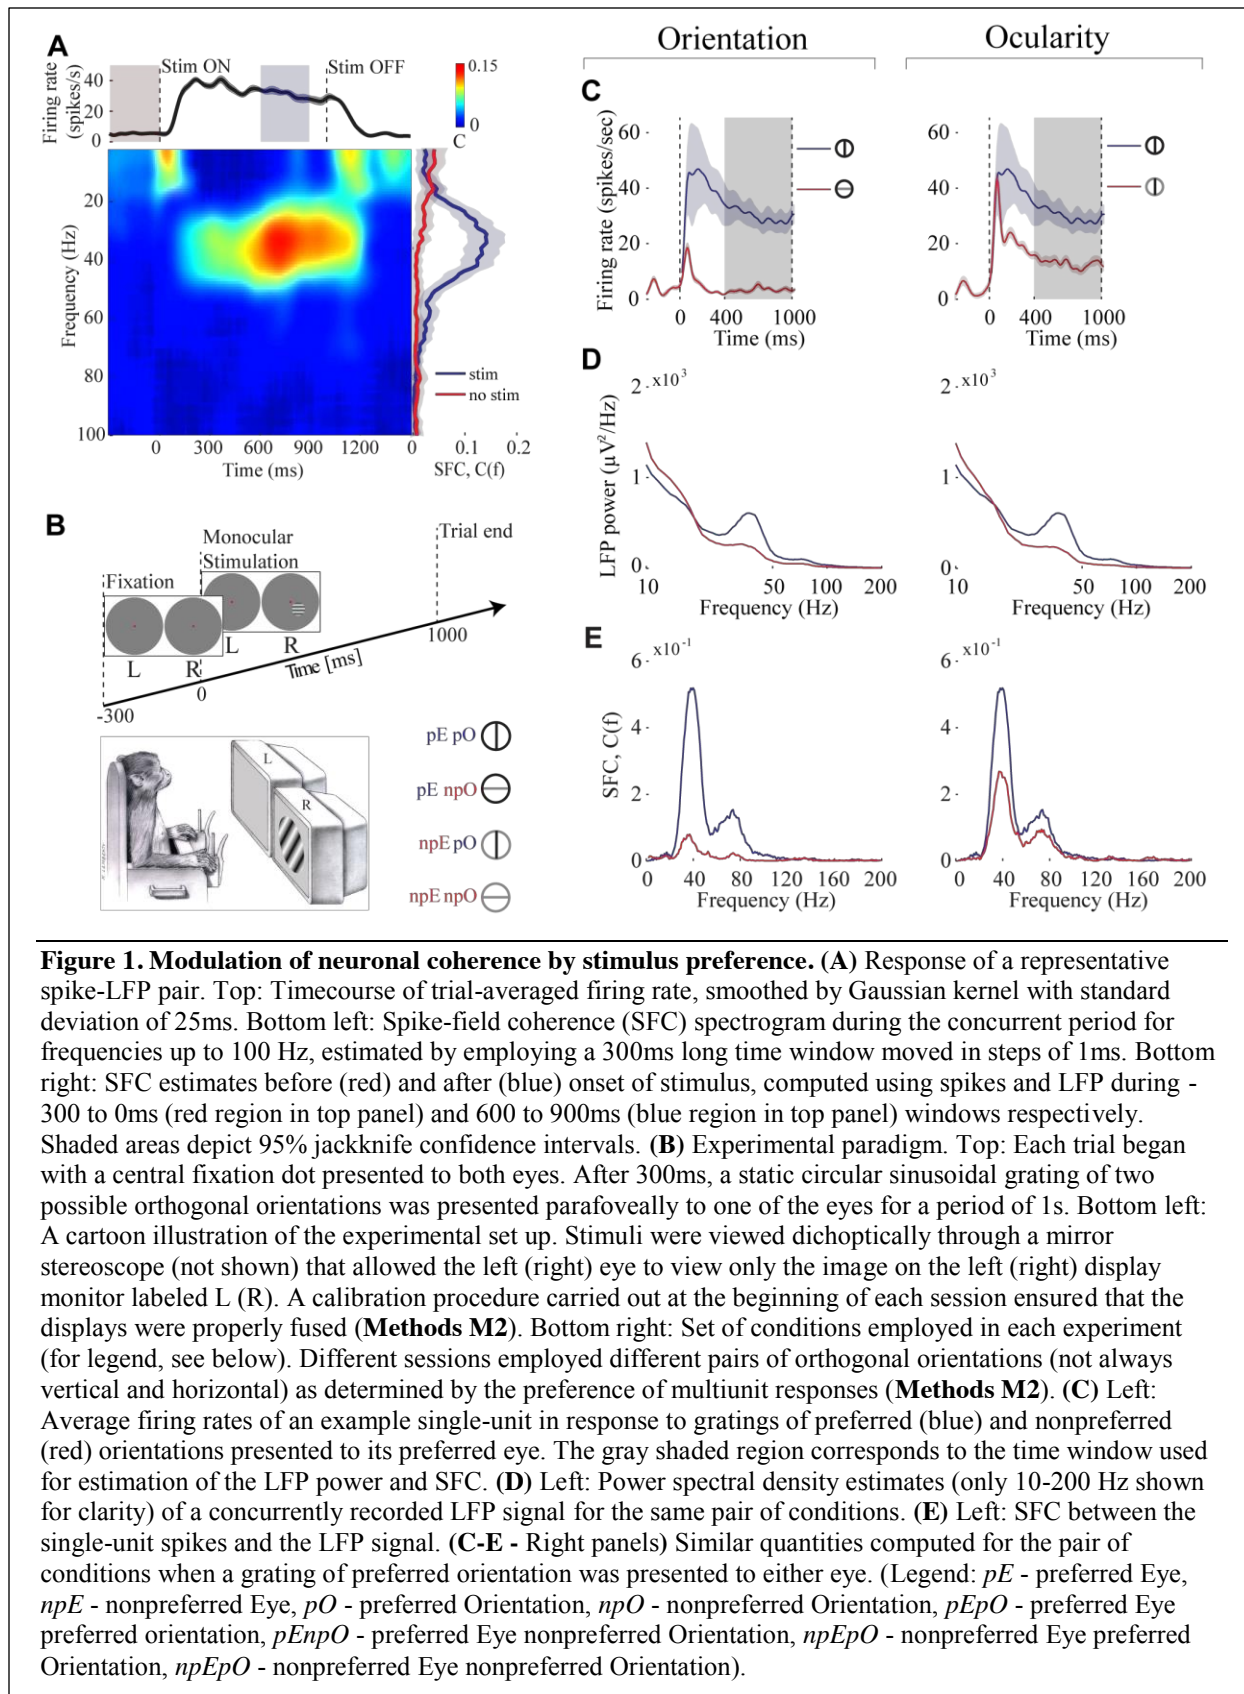

70 of visually responsive units ( $n=166/610$ ; 119 from monkey D98; 47 from monkey F03) were  
71 found to exhibit significant gamma-band SFC ( $p<0.01$ ; permutation test, **Methods M3**). SFCs  
72 were estimated between spike trains of the above single-units and LFPs measured from each of  
73 the simultaneously recorded sites (up to 6 sites in chronic; 4 sites in non-chronic recordings),  
74 yielding a total of 400 spike-LFP pairs. Since we want to study the fluctuations in gamma-band  
75 coherence, following results pertain to these 400 spike-LFP pairs unless stated otherwise.

### 76 **Stimulus-dependent changes in SFC are correlated with firing rates and LFP**

77 We first analyzed stimulus-induced changes in SFC that accompany changes in firing rate and  
78 LFP for each spike-LFP pair by comparing responses under two sets of stimulus conditions (**Fig.**  
79 **1B**): (1) the pair of conditions when either the preferred or nonpreferred orientation was  
80 presented to the neuron's preferred eye ( $pEpO$  vs  $pEnpO$ ), and (2) the pair of conditions when  
81 the preferred orientation was presented to either the preferred or nonpreferred eye separately  
82 ( $pEpO$  vs  $npEpO$ ). These set of conditions were chosen to capture any effects that the differences  
83 in spatial scales between orientation and ocular columns might bear on our analyses.

84 We found that across the population of all spike-LFP pairs, changes in neuronal firing  
85 rate and gamma-band SFC were concomitant. Stimuli that elicited an increase in firing also  
86 produced higher SFC in most cases, i.e. degree of entrainment of spike trains to gamma-band  
87 LFP increased with spike density. On average, this was true both when neuronal response was  
88 manipulated by changing grating orientation as well as eye. As illustrated for one representative  
89 spike-LFP pair, increased spiking activity in response to the neuron's preferred stimuli (**Fig. 1C**)  
90 is accompanied by an increase in LFP power around 40 Hz in a neighboring site (**Fig. 1D**).  
91 Moreover, this spike-LFP pair also exhibits an increased SFC in this frequency range (**Fig. 1E**).

92 Similar effects were observed in the majority of all analyzed spike-LFP pairs and are  
93 readily noticed in the population average of SFCs (**Fig. 2A, Supplementary Fig. 2A**), firing  
94 rates (**Supplementary Figures 1A,2B**), and LFP power spectra (**Supplementary Figures**  
95 **1B,2C**). We tested the significance of stimulus-dependent changes in SFC ( $C$ ) at the peak  
96 gamma frequency and firing rates ( $R$ ) across the population of all spike-LFP pairs and found that  
97 both quantities increased significantly in response to the neuron's preferred orientation as well as  
98 preferred eye (**Fig. 2B** – top panels; population rate:  $R_{pEpO}=14.7\pm 0.8$  spikes  $s^{-1}$ ;  $R_{pEnpO}=7.0\pm 0.6$   
99 spikes  $s^{-1}$ ;  $R_{npEpO}=9.1\pm 0.7$  spikes  $s^{-1}$ , and population coherence:  $C_{pEpO}=0.070\pm 0.002$ ;  
100  $C_{pEnpO}=0.013\pm 0.001$ ;  $C_{npEpO}=0.039\pm 0.002$ ;  $p<10^{-10}$ ; Wilcoxon rank-sum test for the difference in  
101 medians between preferred and non-preferred responses). We examined the relationship between  
102 changes in firing rates and SFCs across the population, by comparing coherence modulation  
103 indices  $M_C$  against corresponding rate modulation indices  $M_R$  (**Methods M3 – Equation 2**).  
104 There was a strong positive correlation between  $M_C$  and  $M_R$  for the set of orientation (**Fig. 2B** –  
105 bottom left; Pearson's correlation  $r=0.83$ ;  $p<10^{-10}$ ) as well as ocularity conditions (**Fig. 2B** –  
106 bottom right, **Supplementary Figure 2D**;  $r=0.72$ ;  $p<10^{-10}$ ). The above relationships were  
107 quantified using perpendicular regression and the slopes were found to be close to unity for the  
108 pair of orientation conditions ( $M_C\approx 0.88M_R$ ; 95% confidence interval (CI): slope=[0.83 0.93]) as  
109 well as for ocularity ( $M_C\approx 0.87M_R$ ; 95% CI: slope=[0.82 0.93]) suggesting that modulation in  
110 gamma-band synchrony and firing rate tend to be nearly identical.

111 Next, we examined whether changes in SFC are related to changes in the strength of  
112 gamma-band LFP. If LFP primarily reflects the average synaptic input to neurons in the local  
113 circuit, then an increase in gamma-band power of the LFP should predict an increase in the  
114 extent of coherent firing of those neurons. Indeed, stimulus-related modulations of SFC were

115

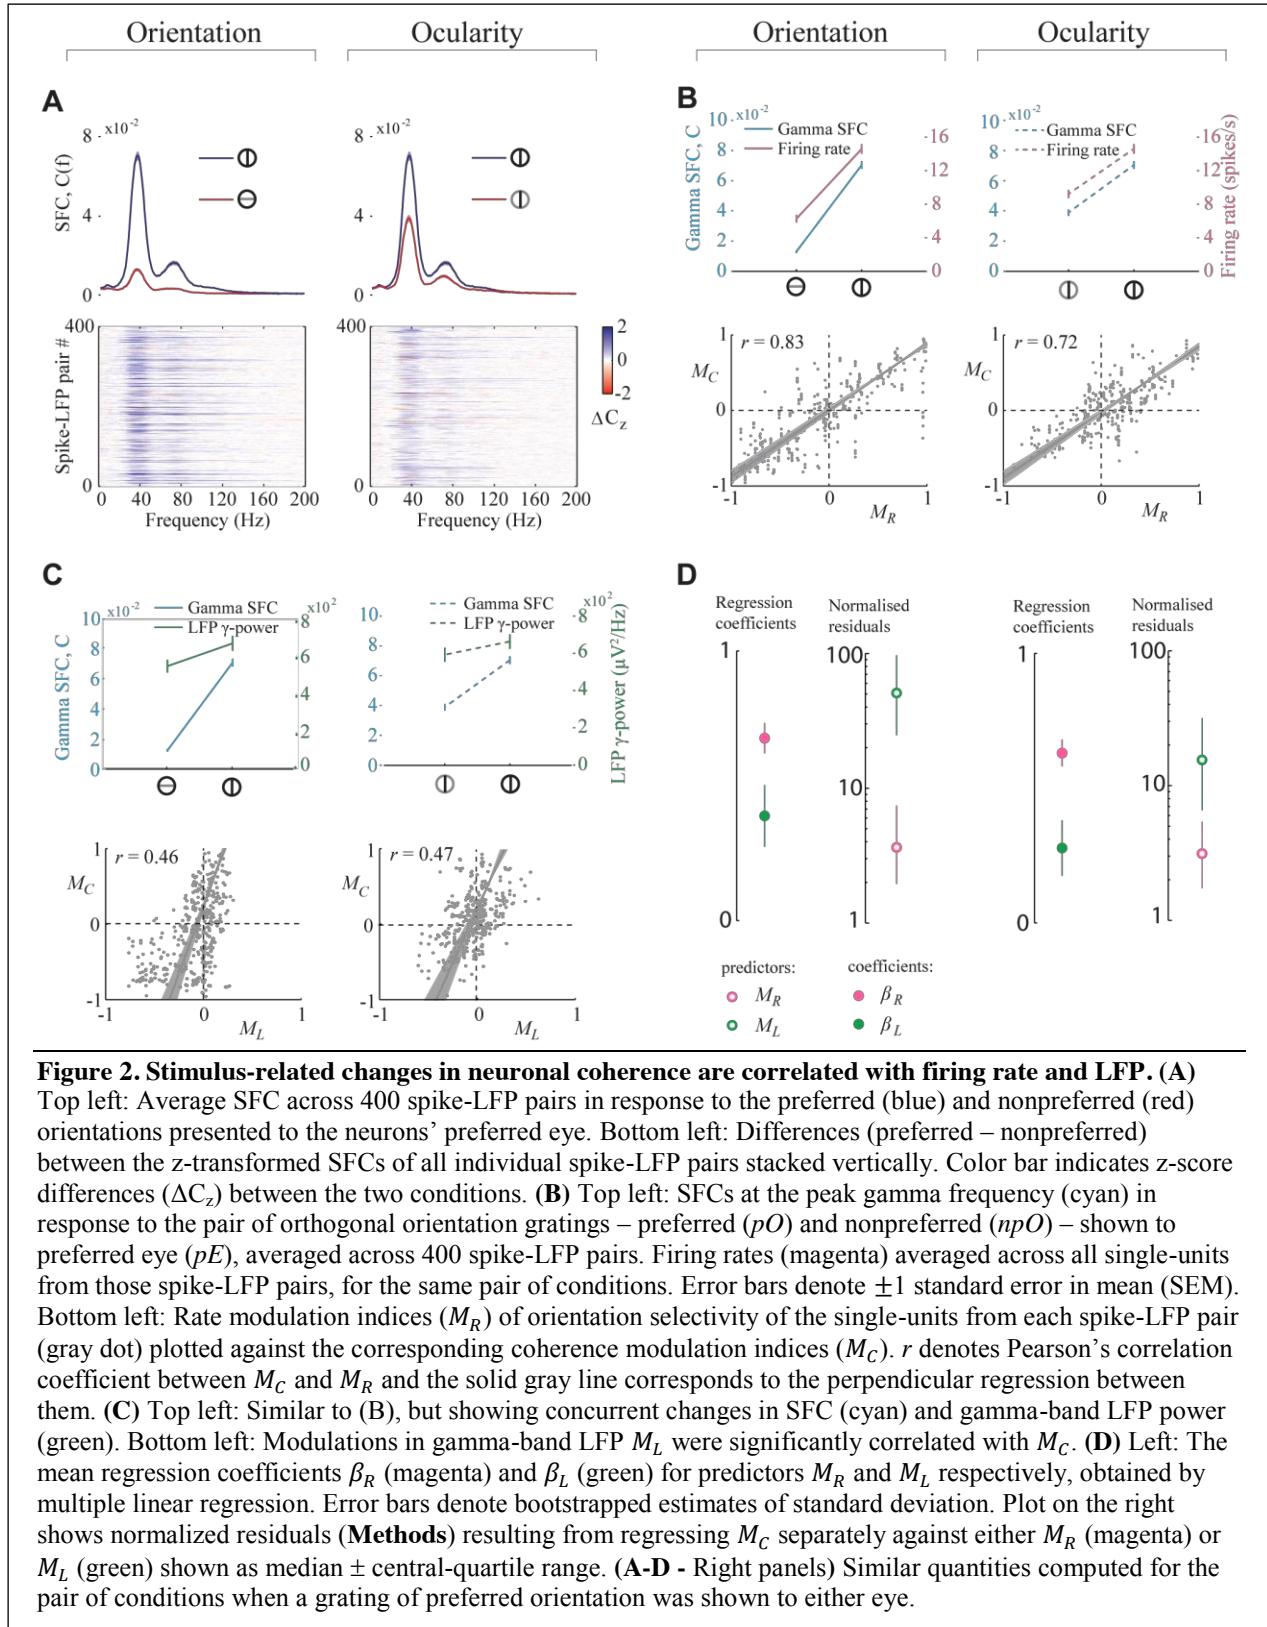

116 largely congruent (**Fig. 2C** - top panels) and significantly correlated with those of the LFP  
117 gamma-band power  $M_L$  in both pairs of stimulus conditions (**Fig. 2C** – bottom panels,  
118 **Supplementary Figure 2E**; orientation:  $r=0.46$ ;  $p<10^{-10}$ ; ocularity:  $r=0.47$ ,  $p<10^{-10}$ ).  
119 Surprisingly however, these correlations were significantly smaller in magnitude than their  
120 correlation with firing rate ( $p<10^{-10}$ , one-tailed two-sample  $t$ -test for the difference in  
121 correlations). Since majority of spike-LFP pairs were comprised of spikes and LFPs recorded at  
122 different sites, we wanted to know whether weaker correlation of neuronal coherence with LFP  
123 was due to distance effects. We tested this by grouping spike-LFP pairs based on the electrode  
124 separation between singleunit spikes and LFPs. We found that the correlation coefficients were  
125 not significantly different across groups thus ruling out this possibility (**Supplementary Fig. 3**).

126 To further quantify the differences between the effect of firing rate and strength of  
127 gamma-band LFP on neuronal coherence, we performed a multiple linear regression of  $M_C$  with  
128 both  $M_R$  and  $M_L$  as simultaneous predictors (**Methods M3 – Equation 3**). We found that the  
129 regression coefficients on  $M_R$  were significantly larger than on  $M_L$  (**Fig. 2D** ; Orientation:  
130  $\beta_R=0.68\pm0.06$ ,  $\beta_L=0.39\pm0.1$ ,  $p<10^{-10}$ , Ocularity:  $\beta_R=0.63\pm0.05$ ,  $\beta_L=0.29\pm0.1$ ,  $p<10^{-10}$ ; one-tailed  
131  $t$ -test comparing regression coefficients  $\beta_R$  vs  $\beta_L$ ), indicating that changes in firing rate rather  
132 than LFP, better explained the stimulus-related variability in gamma-band coherence. In fact,  
133 changes in SFC predicted by a linear regression model solely with  $M_R$  as predictor generated  
134 residuals that were about five to ten times smaller ( $p<10^{-5}$ ,  $t$ -test) than those predicted using  $M_L$   
135 alone (**Fig. 2D**). Nevertheless, regression coefficients of the two predictors were significantly  
136 above zero implying that firing rate and the strength of LFP oscillations both carried independent  
137 information about changes in neuronal coherence.

138 Above results demonstrate that changes in SFC are correlated both with firing rate and  
139 gamma-band LFP, when those changes were induced by stimulus manipulation (either the  
140 orientation or the eye). To test whether these quantities are also correlated in the absence of  
141 stimulus change, we computed their correlated variability across trials within each stimulus  
142 condition. To do this, we estimated the correlation between trial-by-trial pseudo-SFC (pSFC)  
143 values (**Methods M3 – Equation 4**) and concomitant fluctuations in firing rate ( $\rho_{RC}$ ) as well as  
144 gamma-band LFP power ( $\rho_{LC}$ ) at all frequencies. If correlations were exclusively due to stimulus  
145 change, one would expect them to vanish when the measurements are conditioned on the  
146 stimulus. In contrast, across the population of all spike-LFP pairs, both  $\rho_{RC}$  and  $\rho_{LC}$  were found  
147 to be significantly positive in the gamma-band ( $p<10^{-3}$ , Fisher's combined probability test)  
148 within each stimulus condition (**Supplementary Fig. 4A, B**). Thus correlations persisted in the  
149 absence of stimulus change. Furthermore, the strength of correlation at the peak gamma  
150 frequency was found to depend on stimulus identity such that stronger input drive elicited greater  
151 correlations ( $pEpO > npEpO > pEnpO$ ;  $p<10^{-5}$ , Kruskal-Wallis test for correlations vs stimulus).  
152 Specifically, presentation of the neurons' preferred stimuli increased the correlation between  
153 neuronal synchrony and firing rate (**Supplementary Fig. 4A** – inset;  $\rho_{RC}$ :  $pEpO$  -  $0.16\pm0.01$ ,  
154  $npEpO$  -  $0.13\pm0.01$ ,  $pEnpO$  -  $0.11\pm0.01$ ), as well as the correlation between synchrony and  
155 gamma-band LFP (**Supplementary Fig. 4B** – inset;  $\rho_{LC}$ :  $pEpO$  -  $0.15\pm0.01$ ,  $npEpO$  -  $0.10\pm0.01$ ,  
156  $pEnpO$  -  $0.04\pm0.01$ ). These results have two key implications. First, correlation between firing  
157 rate, LFP and neuronal coherence is not simply due to these quantities all being identically tuned  
158 to stimulus, but is likely a signature of an intrinsic mechanism that couples changes in firing rate  
159 and gamma-band LFP to neuronal coherence. Second, this mechanism might be sensitive to  
160 stimulus drive such that a stronger drive leads to a tighter relationship between these measures.

161

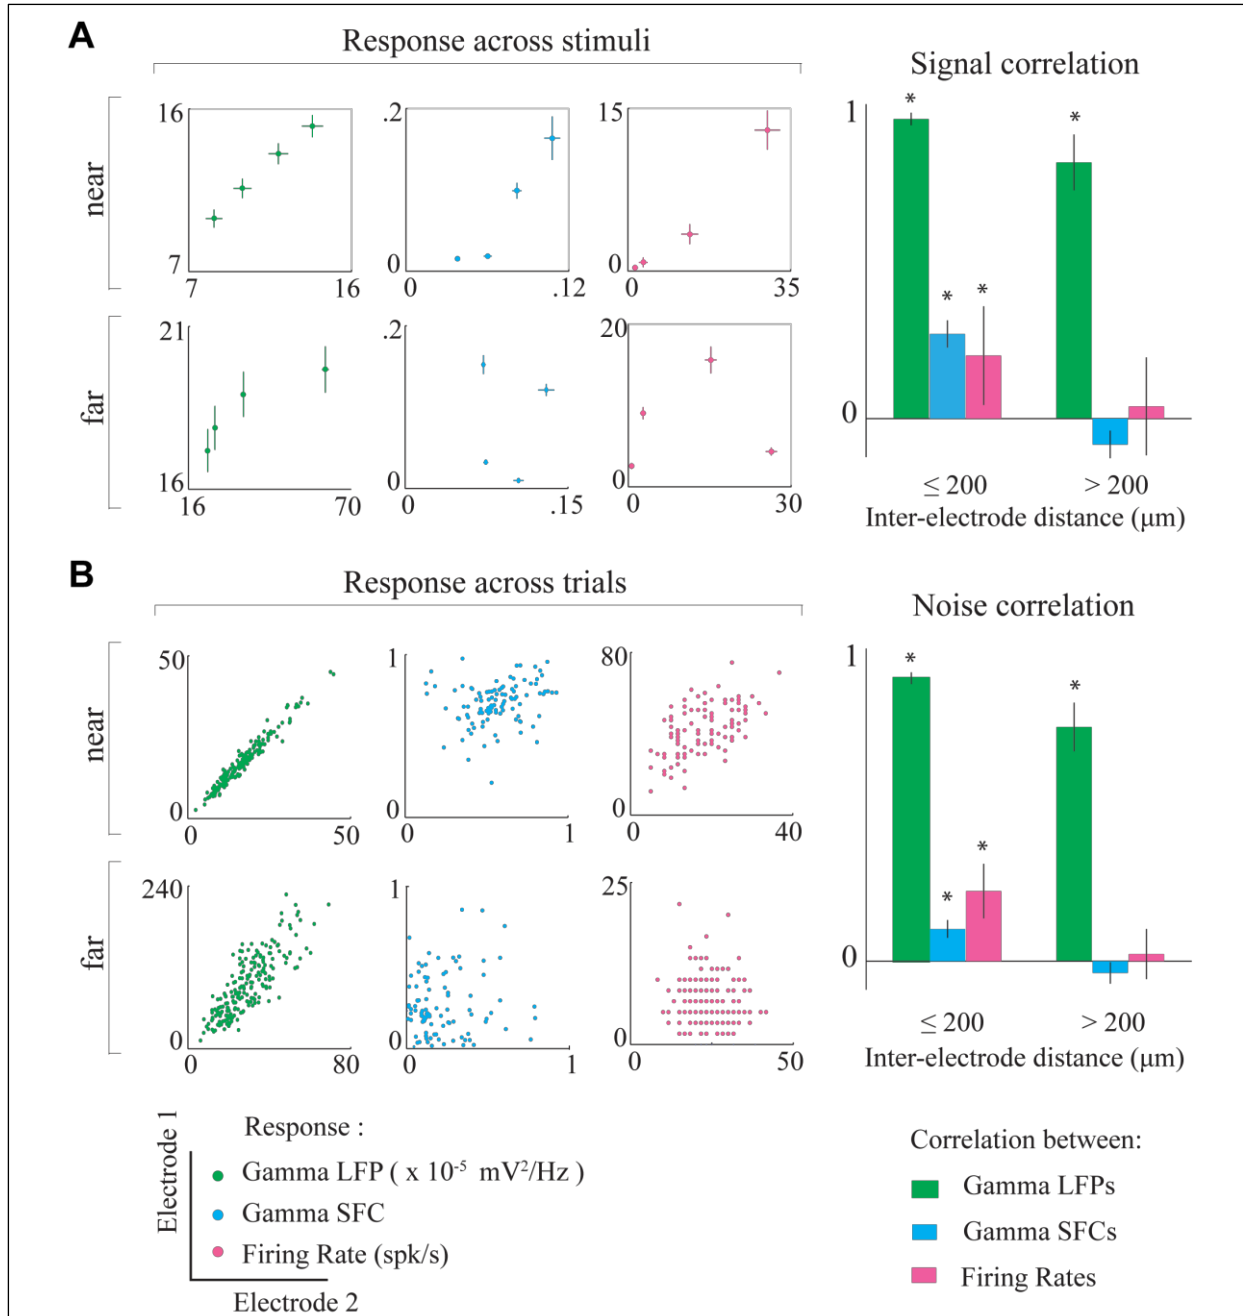

**Figure 3. Spatial scales of LFP and coherence.** (A) Left: Trial-averaged responses to four different stimuli (see Fig. 1B) recorded at two pairs of example sites that were nearby (top panels) or far away (bottom panels). Whereas gamma-band LFP power, gamma-band SFC, and firing rates were all similarly tuned across nearby sites, only gamma-band LFP was similar across more distant sites. Right: Average signal correlations between pairs of nearby (<200 μm) and distant (>200 μm) sites for each of the three response measures. Whereas the tuning of gamma-band LFP remained significantly correlated between distant sites, those of SFC and firing rate were not significantly different from zero for distant sites. (B) Left: Trial-by-trial responses to one of the stimuli at two pairs of example sites. Unlike LFP oscillations, fluctuations in SFC and firing rates were uncorrelated at the pair of distant sites. Right: Average noise correlations showed similar distant-dependent effects as signal correlations. Error bars denote  $\pm 1$  SEM (\*  $p < 0.01$ , two-sided sign test for median correlation of zero).



## 162 **Neuronal coherence and LFP are spatially dissociated**

163 Why do firing rates, rather than LFP rhythms, better predict changes in neuronal coherence? We  
164 have previously shown that, for stimuli presented within the classical receptive field, LFP  
165 reflects activity spanning the order of ocular dominance columns<sup>21</sup>. Since coherence was more  
166 correlated with firing rate, we hypothesized that changes in the global strength of rhythmic  
167 synaptic input reflected in the LFP must be gated by mechanisms of a spatially local origin to  
168 ultimately limit the spatial extent of synchronous firing. If this is true, then the spatial scale of  
169 neuronal synchrony would be determined primarily by that of the firing rate code, and would  
170 hence be much smaller than the scale of LFP rhythms.

171 To test this, we estimated the pairwise correlation between SFCs of simultaneously  
172 recorded neurons as a function of the distance between electrodes from which the neurons were  
173 recorded (**Fig. 3**, cyan). Likewise, we also estimated correlated variability in firing rates of all  
174 pairs of neurons (**Fig. 3**, magenta) as well as correlations in gamma-band LFP powers at the  
175 respective electrode sites from which those neuronal pairs were recorded (**Fig. 3**, green). In each  
176 case, we computed both stimulus-induced (also called ‘signal correlation’, **Fig. 3A**) and  
177 stimulus-independent (‘noise correlation’, **Fig. 3B**) components of the correlation. To assess the  
178 effect of spatial separation, we analysed how correlations in each of the three measures (gamma  
179 LFP, firing rate, and gamma SFC) changed with distance by dividing the pairs of electrodes into  
180 two groups of roughly equal size: those that were nearby ( $\leq 200 \mu\text{m}$ ) or far away ( $> 200 \mu\text{m}$ ).

181 The panel on the left in **Figure 3A** shows concurrent stimulus-induced changes in  
182 gamma-band LFP (green), SFC (cyan), and firing rate (magenta) at pairs of nearby (top) and far  
183 away (bottom) electrode sites. Whereas signal correlations between gamma-band LFPs were  
184 high at both pairs of locations, correlations in SFC and firing rates were both only significant  
185 between neurons in nearby sites. This trend was observed across our dataset (**Fig. 3A** - right).  
186 The similarity in tuning of gamma-band LFP power remained large and significantly above zero  
187 across long distances (nearby pairs:  $r=0.95\pm 0.04$ ,  $p<10^{-10}$ , two-sided sign test; distant pairs:  
188  $r=0.81\pm 0.18$ ,  $p<10^{-10}$ ), whereas signal correlations in both SFCs (nearby pairs:  $r=0.27\pm 0.06$ ,  
189  $p<10^{-10}$ ; distant pairs:  $r=-0.08\pm 0.06$ ,  $p=0.053$ ) and firing rates (nearby pairs:  $r=0.2\pm 0.15$ ,  
190  $p=0.0015$ ; distant pairs:  $r=0.04\pm 0.16$ ,  $p=0.23$ ) were only significant between neuronal pairs in  
191 nearby sites. The magnitude of noise correlations exhibited a similar trend (**Fig. 3B**). Significant  
192 correlations were found between trial-by-trial changes in gamma LFP regardless of distance  
193 (nearby pairs:  $r=0.90\pm 0.03$ ; distant pairs:  $r=0.75\pm 0.16$ ). On the other hand, SFCs (nearby pairs:  
194  $r=0.10\pm 0.05$ ; distant pairs:  $r=-0.04\pm 0.04$ ) and firing rates (nearby pairs:  $r=0.22\pm 0.08$ ; distant  
195 pairs:  $r=0.02\pm 0.07$ ) of neurons at distant sites were both uncorrelated.

## 196 **LFP rhythms are robustly correlated with membrane potential**

197 Above results suggest that although neurons with large separation likely receive similar rhythmic  
198 synaptic inputs as implied by the long-range correlations in the LFP, their outputs are incoherent.  
199 Instead the spatial scale of neuronal coherence is similar to that of firing rates. This raises the  
200 possibility that globally correlated rhythmic synaptic inputs are gated by spatially local  
201 mechanisms that are sensitive to neurons’ activation level, to ultimately restrict the extent of  
202 rhythmic synchronization of their outputs.

203 However a alternative explanation for dissociation in the spatial scales of neuronal  
204 coherence and LFP is that gamma activity in LFP does not reflect the strength of rhythmic  
205 synaptic inputs to the neurons in our recording. If rhythmic input to individual neurons was more

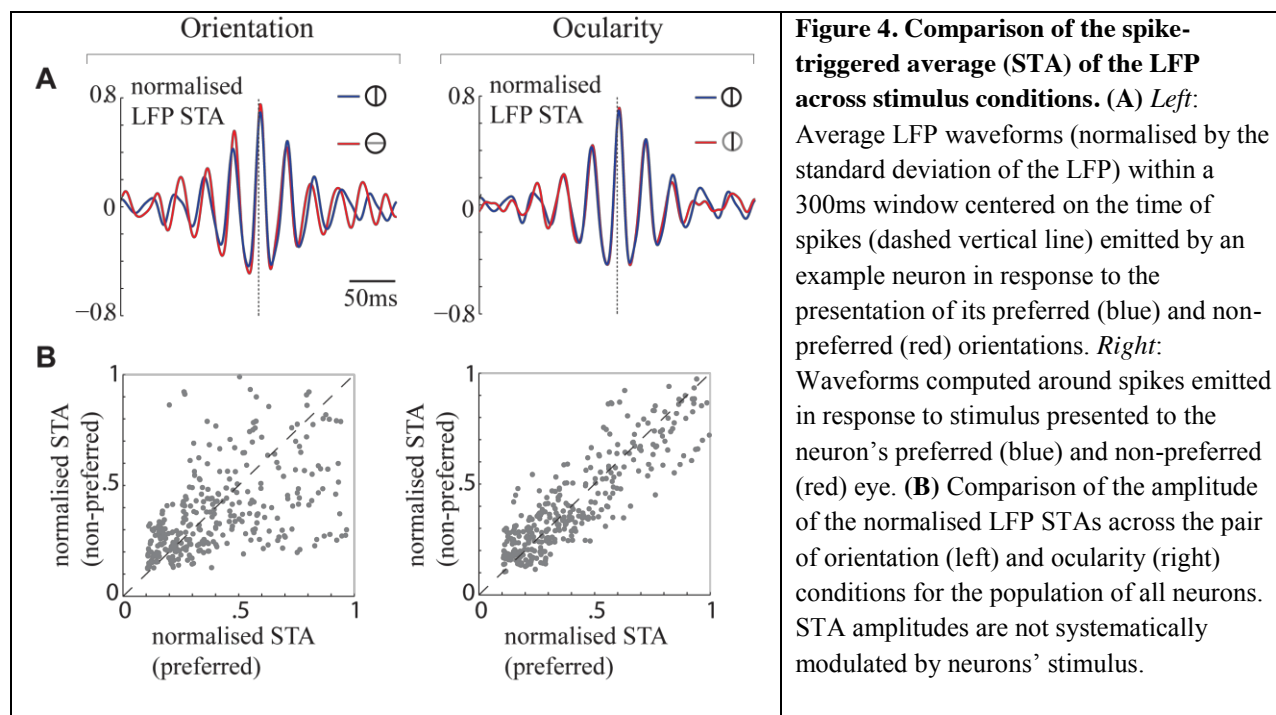

206 local than the LFP suggests, then the lack of a strong relation between neuronal synchrony with  
 207 LFP could be explained away without the need to invoke any local mechanism. A direct way to  
 208 test this alternative would be to compare LFP rhythms against oscillations in membrane potential  
 209 of the neurons in our dataset. Such a direct comparison was not possible due to difficulties  
 210 associated with performing stable intracellular recordings in awake macaques. Instead, we  
 211 indirectly estimated the correlation between membrane potential and LFP by computing spike-  
 212 triggered average (STA) of the LFP. We computed normalised STAs for each neuron under all  
 213 stimulus conditions by dividing the STA by the standard deviation of the LFP under the  
 214 corresponding condition (**Methods M3**). A previous study involving simultaneous intra- and  
 215 extracellular recordings has shown that this normalised STA is essentially equal to the cross-  
 216 correlation between the neuron's membrane potential and the LFP<sup>22</sup>. Therefore we used the  
 217 amplitude of the normalised STAs to assess whether gamma-band LFP is a good predictor of  
 218 gamma rhythmic synaptic inputs to the individual neurons in our dataset. **Figure 4A** shows  
 219 normalised LFP STAs estimated using spikes of one example neuron under the pair of  
 220 orthogonal stimulus conditions. STAs of this neuron revealed a substantial correlation between  
 221 the LFP and synaptic inputs in the gamma range, and the magnitude of this correlation was  
 222 similar across stimulus conditions. This was true on average across the population of all neurons  
 223 (STA amplitudes: *pEpO* -  $0.44 \pm 0.28$ , *npEpO* -  $0.44 \pm 0.26$ , *pEnpO* -  $0.42 \pm 0.27$ ). The median  
 224 amplitudes of STA were not significantly different across orientations of the grating (**Fig. 4B**;  
 225  $p=0.50$ , Wilcoxon rank-sum test) or the eyes that were stimulated (**Fig. 4B – right**;  $p=0.57$ ). If  
 226 gamma rhythmic input to individual neurons was already localized in space and varied  
 227 concomitantly with firing rates, then its correlation with the global LFP signal should change  
 228 with stimulus. In contrast, our results show that gamma-band LFP can predict the strength of  
 229 rhythmic synaptic input equally well under all stimulus conditions. This robustness suggests that  
 230 rhythmic input to neurons must be broadly correlated across space and argues for an active  
 231 mechanism that decorrelates the neuronal outputs.

232

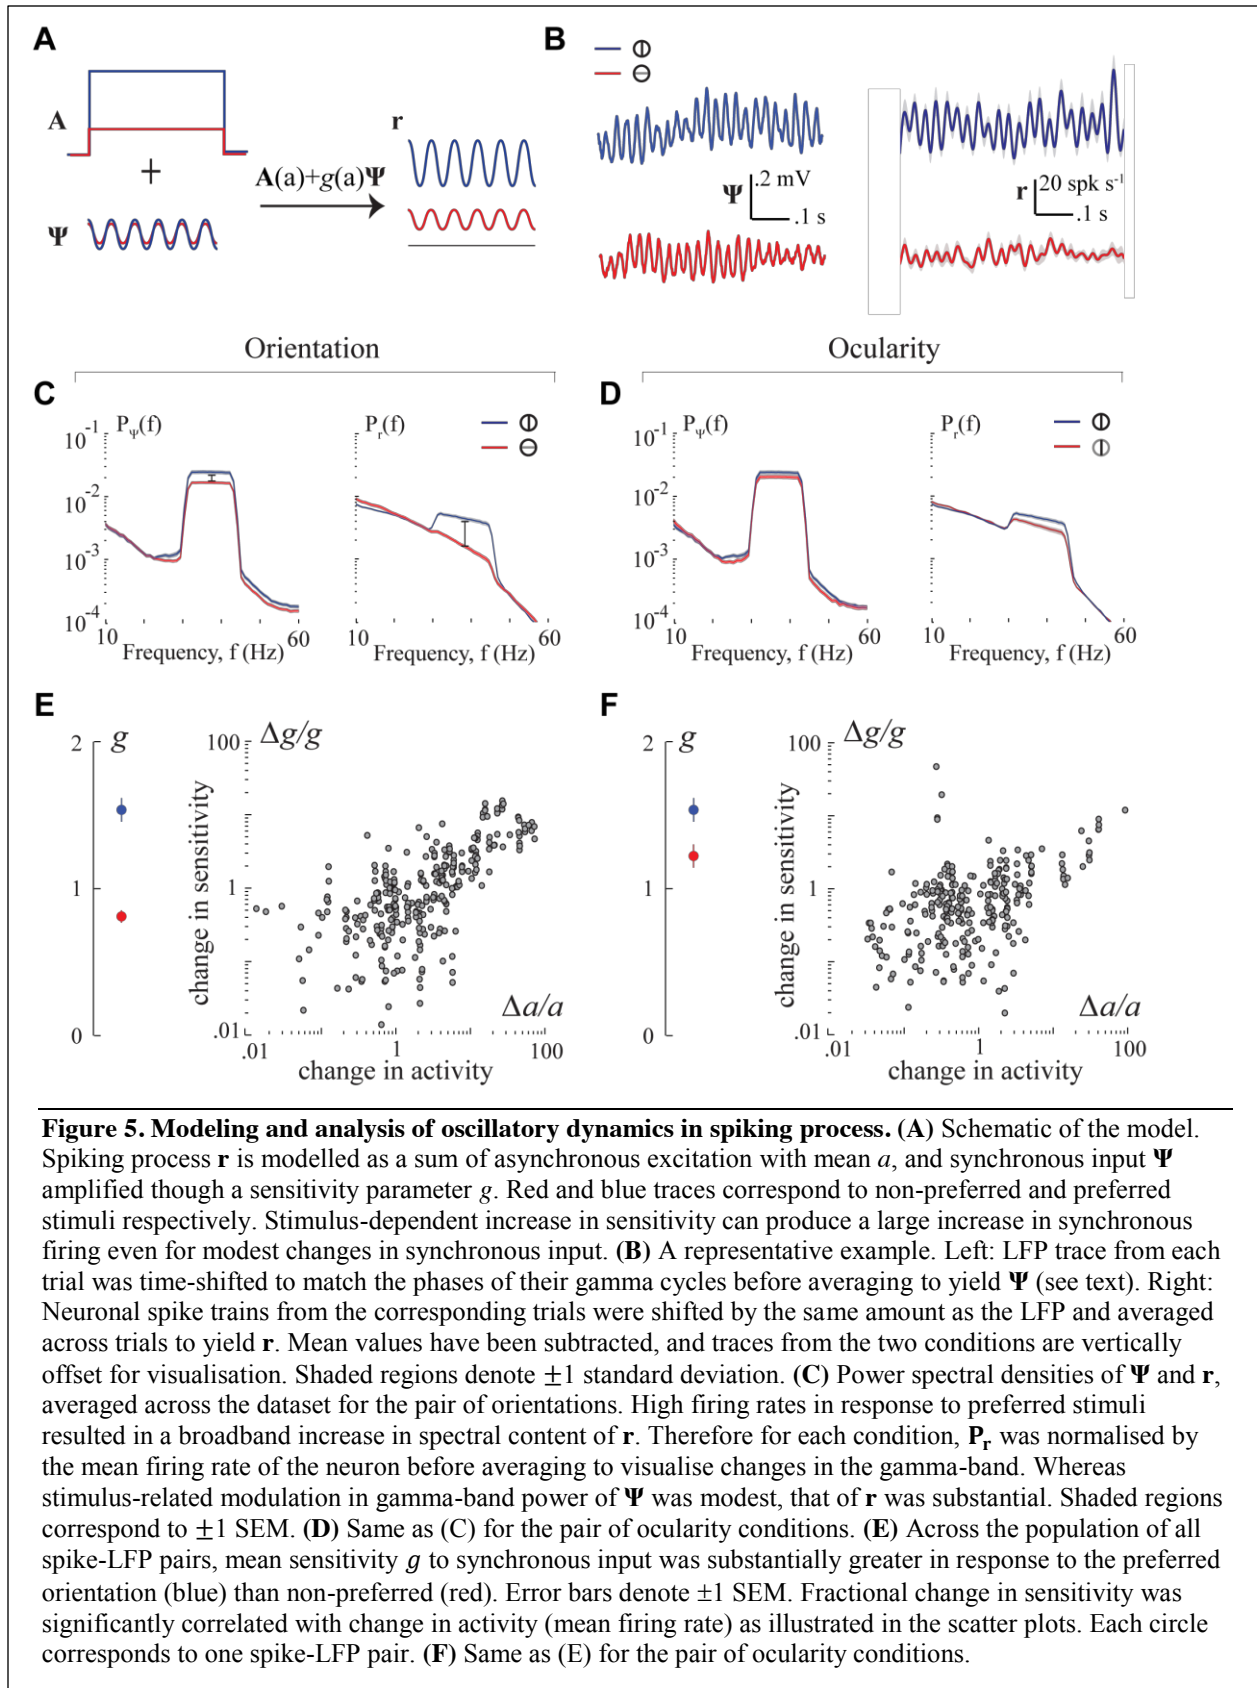

### 233 **Activity-dependent increase in sensitivity to synchronous input**

234 In order to account for our experimental findings, we considered a simple linear model in which  
235 the spiking process  $\mathbf{r}$  is given by  $\mathbf{r} = \mathbf{A} + g \cdot \boldsymbol{\psi}$  where  $\mathbf{A}$  denotes asynchronous activation with  
236 mean  $a$  that reflects the net excitatory synaptic drive,  $\boldsymbol{\psi}$  is the rhythmic synaptic input, and the  
237 gating parameter  $g$  represents the sensitivity to synchronous input. The activation parameter  $a$   
238 determines the average firing rate of the neuron, while  $g$  determines how well synchronous input  
239  $\boldsymbol{\psi}$  is encoded in the temporal pattern of spikes. In this model, rhythmic input drives coherence in  
240 the output while asynchronous activation reduces it. Thus neuronal coherence should be  
241 positively correlated with the strength of rhythmic input but anti-correlated with the overall  
242 activation level reflected in the firing rate (**Supplementary notes, Supplementary Fig. 5A**), a  
243 prediction at odds with our experimental results. However, if there is an activity-dependent  
244 increase in sensitivity to synchronous input ( $g \propto a$ ) that facilitates the transfer of synchrony,  
245 synchrony at the output could increase with firing rate (**Supplementary notes, Supplementary**  
246 **Fig. 5B**). Therefore, we wanted to know whether stimulus-related increase in neuronal coherence  
247 in our dataset was attributable to such an increase in sensitivity to rhythmic input accompanying  
248 the overall increase in activation level in response to preferred stimulus (**Fig. 5A**).

249 For each spike-LFP pair, we used the LFP signal as a proxy for  $\boldsymbol{\psi}$  and inferred model  
250 parameters  $a$  and  $g$  that explained the spiking activity  $\mathbf{r}$ . There were two challenges in this  
251 approach. First, while average synaptic input constitutes the major source of extracellular  
252 currents, LFP is also likely to contain traces of currents emerging from calcium spikes, action  
253 potentials, and spike after-potentials. Since the gamma rhythmic synaptic inputs are not precisely  
254 phase-locked with stimulus onset, we cannot use stimulus-locked trial-averaging to isolate the  
255 component reflecting rhythmic synaptic input. Second, spikes from individual trials are typically  
256 too sparse and noisy to allow reliable assessment of the underlying temporal dynamics. Once  
257 again due to the lack of phase consistency between rhythmic spiking activity and stimulus onset,  
258 trial-averaged firing rates typically fail to reveal the rhythmic process underlying spike  
259 generation (see Fig. 1C for example). We used the following technique to overcome both issues.  
260 We time-shifted our LFP traces on each trial by a small amount so that the peak gamma  
261 frequency in the LFP was phase-matched across trials. Spike trains from corresponding trials  
262 were shifted by the same amount to ensure that this procedure preserved the phase consistency of  
263 spike-trains relative to LFP i.e. spike-field coherence (**Supplementary Fig. 6**). **Figure 5B** shows  
264 the trial-averaged traces of the resulting time-shifted LFP ( $\boldsymbol{\psi}$ ) and spiking process ( $\mathbf{r}$ )  
265 reconstructed above for a representative spike-LFP pair. In this example, it is clear that although  
266 the increase in amplitude of gamma oscillations in  $\boldsymbol{\psi}$  was modest, there was a marked increase in  
267 the rhythmicity of  $\mathbf{r}$  in response to preferred stimulus. This was observed across our dataset and  
268 can be noticed in the population averages of the power spectra of  $\boldsymbol{\psi}$  and  $\mathbf{r}$  (**Fig. 5C, D**).

269 If sensitivity  $g$  was independent of stimulus, the relative change in spectral content of  $\mathbf{r}$   
270 would be comparable to those in  $\boldsymbol{\psi}$ . However, the fractional increase in gamma-band power was  
271 larger in  $\mathbf{r}$  suggesting that there was a stimulus-dependent increase in sensitivity. To confirm  
272 this, we fit the activation parameter  $a$  and sensitivity  $g$  individually for each spike-LFP pair.  
273 Whereas  $a$  was trivially given by the mean of the spiking process  $\mathbf{r}$ , sensitivity  $g$  was inferred by  
274 computing the fraction of temporal variability in spiking that was contributed by the rhythmic  
275 input (**Supplementary Fig. 7, Methods equation (5)-(6)**). As shown in **Figure 5E, F** (left  
276 panels), there was indeed a significant increase in sensitivity to rhythmic input in response to  
277 preferred stimulus ( $p < 10^{-5}$ ; Wilcoxon rank-sum test). Moreover, changes in sensitivity were  
278 strongly correlated with the increase in neuronal activation  $a$  (Pearson's correlation - orientation:

279  $r=0.59, p<10^{-5}$ ; ocularity:  $r=0.31, p<10^{-5}$ ) (**Fig. 5E, F** - right), and not to the strength of rhythmic  
280 input (orientation:  $p=0.78$ ; ocularity:  $p=0.57$ ) (**Supplementary Fig. 8**). Does the increase in  
281 sensitivity specifically underlie the increase in neuronal coherence? We tested this by  
282 partitioning the spike-LFP pairs into two groups, based on whether stimulus-dependent changes  
283 in neuronal coherence were congruent or incongruent with firing rates. Whereas preferred stimuli  
284 elicited a large increase in sensitivity in the congruent pairs, the effect on incongruent pairs was  
285 much smaller and barely approached significance (orientation:  $p=0.07$ , Wilcoxon rank-sum test,  
286  $n=69$  spike-LFP pairs; ocularity:  $p=0.09, n=100$ ; **Supplementary Fig. 9**) confirming that  
287 decrease in coherence with firing rates in these pairs were attributable to the lack of increase in  
288 sensitivity to rhythmic input. Together, these results suggest that there is activity-dependent  
289 increase in sensitivity to rhythmic input, and that this specifically underlies the strong  
290 correlations between firing rate and neuronal coherence.

## 291 **Discussion**

292 We examined concomitant changes in gamma-band neuronal coherence, firing rate, and strength  
293 of extracellular gamma rhythms in the primary visual cortex of awake rhesus macaques viewing  
294 monocularly presented grating stimuli. We found three key results that all point to an active  
295 mechanism that modulates the transfer of synchrony by neurons depending on their overall  
296 activation level.

297 First, neuronal gamma-band coherence quantified using spike-field coherence (SFC)  
298 increased with firing rate such that stimulus identity (both orientation and eye) was encoded in  
299 both quantities. Although neuronal coherence has previously been observed to increase with  
300 firing rate, some studies have found that rate and coherence encode different features of the  
301 stimulus leading to the view that the two codes carry complementary information<sup>23–25</sup>. In  
302 contrast, our result suggests that the two may also operate in tandem to increase information  
303 throughput about the same stimulus feature.

304 Second, neuronal coherence was more strongly correlated with firing rate than with the  
305 strength of gamma rhythms in the local field potential (LFP). This is surprising because gamma  
306 rhythms in the LFP are thought to reflect synchronous synaptic inputs<sup>26,27</sup> that orchestrate  
307 rhythmic synchronization between neurons. On the other hand, SFC measures coherence in the  
308 spiking activity and largely reflects the amount of coherent output of the neurons. The fact that  
309 SFC was better predicted by firing rates suggests that the net coherence transferred by neurons  
310 depends more strongly on their overall activation level than on the strength of synchronous input.  
311 In one previous study, individual neurons in cortical slices were stimulated by injecting current  
312 steps of different means combined with noisy gamma oscillatory currents to study how the  
313 oscillations interact with the overall activation level<sup>28</sup>. The authors observed that the activation  
314 level had a significant impact on the timing of spikes elicited by gamma oscillatory input in a  
315 manner that increased the probability of coincidental spiking between neurons with similar firing  
316 rates, a phenomenon they called “rate-specific synchrony”. Although their work does not pertain  
317 to oscillatory neuronal synchronization and therefore distinct from ours, it supports the notion  
318 that activation level could have a significant impact on determining how gamma oscillatory input  
319 affects neuronal spiking.

320 Third, the spatial scale of gamma-band neuronal coherence was much smaller than  
321 extracellular gamma rhythms, but indistinguishable from that of the firing rate code. If coherent  
322 spiking were a consequence of passive integration of rhythmic synaptic inputs reflected in the  
323 LFP, it would share the same spatial scale as extracellular rhythms. The fact that the spatial  
324 correlation of neuronal coherence was instead comparable to that of firing rates reinforces the  
325 view that neuronal activation level must play a key role in the gating of rhythmic inputs. It  
326 follows that the local differences in activation level would decorrelate long-range coherent  
327 fluctuations in gamma rhythmic synaptic input to restrict the spatial scale of coherence in spiking  
328 activity. Although the spatial scale of LFP gamma rhythms in our measurements is consistent  
329 with earlier work, it has been shown that this scale is in fact variable and depends on the size of  
330 the stimulus<sup>29,30</sup>. While it is likely that the precise scale of extracellular rhythms in our dataset is  
331 specific to our choice of stimulus size, we believe this does not affect our interpretation. In fact,  
332 large spatial correlations in LFP rhythms induced by our stimulus helped capture the decoupling  
333 between the spatial scale of neuronal coherence and the LFP. We note that the pattern of results  
334 was qualitatively similar regardless of whether changes in responses were brought about by  
335 changes in orientation or ocularity. Given that the spatial scale of orientation and ocular columns  
336 in macaque V1 differ by at least an order of magnitude<sup>31,32</sup>, our findings here are likely to extend

337 beyond the encoding of specific stimulus features. Together, our experimental results all point to  
338 some form of interaction between neuronal activation-level and gating of rhythmic inputs.

339 We tested this possibility by developing a novel statistical technique to fit a linear model  
340 that explicitly captured the dependence of rhythmic spiking on both the overall activation level  
341 as well as the strength of synchronous input through a sensitivity parameter. We found that  
342 stimulus-related increase in gamma rhythmicity of the spiking process could not be entirely  
343 accounted for by an increase in strength of rhythmic synaptic input but stemmed largely from an  
344 activation-dependent increase in neuronal sensitivity to rhythmic drive. Although our model is  
345 phenomenological, past experiments suggest that our findings may have mechanistic origins at  
346 the neuronal level. Intracellular recordings in vivo have demonstrated an activity-dependent  
347 increase in spike threshold that facilitates coincidence detection<sup>33-37</sup>. Consistent with this,  
348 biophysical modeling studies and slice recordings show that increase in Poisson-like synaptic  
349 background activity increases the sensitivity of pyramidal neurons to temporally structured  
350 synaptic input<sup>38-40</sup> by effectively increasing voltage threshold via *M* currents<sup>41,42</sup>. It is possible  
351 that such dynamic changes in synaptic integration properties may also underlie the ability of  
352 neurons to adapt their sensitivity to gamma rhythms reported here. In fact, recently Perrenoud et  
353 al used intracellular recordings to demonstrate that increased phase-locking of pyramidal neurons  
354 to the gamma cycle is facilitated by an overall increase in the average membrane potential in  
355 response to visual stimulation<sup>43</sup>. Alternatively, the observed changes in response characteristics  
356 of neurons and the associated gamma-band synchronization could be a reflection of network-  
357 level computations such as divisive normalization<sup>44</sup>. If this is the case, the normalization pool is  
358 likely to be confined to within an orientation column for otherwise we would not have observed  
359 orientation-dependent changes in neuronal sensitivity. Further experiments will be necessary to  
360 identify whether the observed phenomenon is dominated by a cellular or network mechanisms.

361 There are some fundamental issues in relation to past findings which merit further  
362 scrutiny. First, increase in neuronal gamma-band synchronization with firing rate has been  
363 reported previously<sup>5,6,12,45,46</sup>. Theoretical studies have shown that this dependence is expected for  
364 a broad class of statistical models<sup>47,48</sup>. Mechanistically, such dependence could stem from a  
365 simple threshold nonlinearity in the neurons<sup>49</sup>. However, simulations of model neurons with a  
366 fixed threshold substantially underestimated the magnitude of rate-dependent increase in SFC  
367 observed in our data (**Supplementary Fig. 10-11**). Instead, our data was better explained by a  
368 model in which neuronal threshold increased with the mean activity of the neurons  
369 (**Supplementary Fig. 12**). This dynamic threshold model is consistent with several past  
370 experimental results, and supports the idea that the mechanism mediating neuronal coherence is  
371 sensitive to neuronal activation. Second, since synaptic currents constitute a major source of  
372 fluctuations in the LFP<sup>18-20</sup>, we used gamma oscillatory power in the LFP as a proxy for the  
373 strength of rhythmic synaptic input to neurons. Although the precise magnitude of rhythmic  
374 input to individual neurons likely differs from that estimated using the LFP<sup>20</sup>, our conclusions  
375 are valid insofar as the relative changes in LFP oscillations are correlated with those of  
376 oscillatory input to single neurons across stimulus conditions. It is difficult to test this precisely  
377 without intracellular recordings. However it has previously been shown that the average LFP  
378 waveform around the time of a neuron's action potential (spike-triggered LFP) reflects the  
379 correlation between the LFP and that neuron's synaptic inputs<sup>22</sup>. The STAs in our dataset had  
380 particularly large gamma-band powers and their amplitudes were not significantly modulated by  
381 stimulus, so we believe gamma activity in the LFP provided a robust readout of the strength of  
382 gamma rhythmic synaptic inputs. Finally, neuronal coherence in the gamma band is known to

383 vary independently of firing rates in some cases<sup>11,24,50,51</sup> suggesting that top-down factors such as  
384 attention may also potentially enhance coherence by altering neuronal sensitivity in a similar  
385 manner. Moreover, factors such as noise-level and size of stimulus have been shown to alter the  
386 spatial scale of LFP leading to more spatially tuned gamma activity<sup>29,30,52</sup>. In such cases, changes  
387 in coherence can also come about more directly from an increase or decrease in rhythmic  
388 synaptic input to neurons regardless of their activation-level. Quantitative analyses using an  
389 approach similar to ours will be necessary to clarify the mechanistic origins of rate-independent  
390 changes in coherence.

391 The potential implications of gating coherence based on activation-level are at least  
392 twofold. First as we have shown, this would lead to a similarity in the spatial resolution of firing  
393 rate and gamma synchrony codes. It has been argued that the brain can decode temporally  
394 multiplexed codes using known mechanisms<sup>4</sup> such as synaptic depression and facilitation that  
395 endow neurons with multiple synaptic timescales<sup>53,54</sup>. Performing spatial de-multiplexing in  
396 addition to the above would not be as easy because it would require differential spatial pooling  
397 depending on the timescale. Moreover it is unclear if such algorithms might be supported by the  
398 brain's neural hardware. The proposed mechanism obviates the need to deal with such  
399 complexities by matching the spatial scales of the two codes. Second, current theories suggest  
400 that gamma synchrony may be involved in the encoding of sensory information<sup>55-57</sup>, regulating  
401 information flow between brain areas<sup>58-60</sup>, and facilitating synaptic plasticity<sup>6,61,62</sup>. Supporting  
402 such a diverse range of functions would require synchrony to be robust to the precise level of  
403 neuronal activity. Adaptive gating of coherence based on activation-level would also help  
404 achieve this by preserving the transfer of synchrony in the face of elevated asynchronous  
405 background activity.



## 406 **Methods**

### 407 **M1 Electrophysiological recordings**

408 Two adult male rhesus monkeys (*Macaca mulatta*) D98 and F03 weighing 16 kg and 11 kg  
409 respectively, took part in the experiments. Cranial headposts and form-specific chambers were  
410 surgically implanted. Recording chambers were positioned stereotactically over the operculum in  
411 area V1 in both hemispheres of D98 and right hemisphere of F03 with the aid of high-resolution  
412 anatomical scans. Skull parameters extracted from these scans were used for designing the  
413 headpost and the recording chambers to fit the skull surface. A more detailed description of these  
414 methods can be found elsewhere<sup>63-65</sup>. A custom-built array of tetrodes<sup>66</sup> was chronically  
415 implanted in area V1 inside the recording chamber implanted in the left hemisphere of the  
416 monkey D98. The tetrodes were at least 200 $\mu$ m apart<sup>67</sup>. Recordings were also carried out non-  
417 chronically from the right hemisphere of both monkeys. In these sessions, one to four manually  
418 adjustable microdrives (Crist Instrument Co.) were inserted into a custom-built grid and the  
419 activity was recorded using tetrodes. The experimental and surgical procedures were performed  
420 with great care and in full compliance with the German Law for the Protection of Animals, the  
421 European Community guidelines for the care and use of laboratory animals (EUVS  
422 86/609/EEC), and the recommendations of Weatherall report<sup>68</sup>. The regional authorities  
423 (Regierungspräsidium Tuebingen) approved our experimental protocol application and the  
424 institutional representatives for animal protection supervised all procedures.

425 The raw voltage signal was passed through an analog bandpass filter (1-475 Hz), sampled  
426 at ~1990.7 Hz, digitized (12 bits) and stored as the LFP signal. Multiunit spikes were identified  
427 by passing the raw signal through a separate analog bandpass filter (600 Hz-6 KHz), followed by  
428 sampling (32 KHz), digitization (12 bits) and detecting the times at which the signal crosses a  
429 predefined threshold (25 $\mu$ V). Following each threshold crossing, a segment of 32 samples (1ms)  
430 was extracted from all four channels of the tetrode and these waveforms were stored for offline  
431 clustering. Single-unit spikes were then isolated from multiunit activity by a custom-built  
432 clustering software<sup>66</sup> that uses features extracted from the stored multiunit spike waveforms.

### 433 **M2 Visual stimuli**

434 A dedicated graphics workstation (TDZ 2000; Intergraph Systems) running an OpenGL-based  
435 program was used for rendering visual stimuli, while the behavioral aspects (e.g. juice reward,  
436 trial abortion) were controlled using the QNX real-time operating system (QNX Software  
437 Systems Ltd). The display system comprised of a custom-made mirror stereoscope with an LCD  
438 monitor (resolution of 1024x768; refresh rate of 60 Hz) on each side as shown in **Fig. 1B**, and  
439 allowed for dichoptic presentation of stimuli.

440 Each session began with a calibration procedure<sup>63</sup> to ensure that the monkeys could  
441 correctly overlay (fuse) the central fixation markers (0.2°) on the two displays. The following  
442 procedure was then carried out to determine the position and orientations of the stimuli to be  
443 used in the experiments. A grating of arbitrary orientation was presented binocularly (i.e., shown  
444 to both eyes) at a parafoveal location while the monkey fixated on the central marker. The  
445 location, size and orientation of the grating are then systematically changed until the location of  
446 the receptive field and the orientation preference of the multiunit response could be estimated.  
447 Such online estimation was made possible by playing the multiunit activity through a sound  
448 amplifier (Grass Technologies). The pair of orthogonal orientations ( $\theta_A$  and  $\theta_B$ ) that elicited  
449 maximal differential multiunit response were identified and used in the experiment.

450 Each trial of the experiment began with the monkey fixating on a central marker (0.2°).  
451 After maintaining fixation for 300ms, a static sine-wave grating stimulus (diameter of 1-2°;

452 spatial frequency of 3-5 cycles/deg; contrast 70%) of two possible orientations was displayed  
453 monocularly to one of the eyes for a period of one second (**Fig. 1B**). The animal was required to  
454 maintain fixation within a circular window with a radius  $0.5^\circ$  from the center of the marker  
455 throughout the duration of the trial. At the end of each successful trial, a drop of apple juice was  
456 delivered as a reward. A failure resulted in abortion of the trial without reward. Depending on the  
457 orientation of the grating and eye of presentation, each trial belonged to one of four stimulus  
458 conditions (**Fig. 1B**). A typical recording session included 200 trials of each condition.  
459 Throughout this paper, the term ‘preferred’ orientation (eye) is used to refer to the orientation  
460 (eye) that elicits higher firing rate for a given singleunit. The complementary condition is dubbed  
461 ‘nonpreferred’.

### 462 **M3 Data Analysis**

463 Singleunits were first tested for visual responsiveness by comparing stimulus-evoked firing rates  
464 to baseline. Only neurons that exhibited a significant increase in their firing rates in response to  
465 visual stimulus ( $p < 0.05$ ; Wilcoxon rank-sum test) were considered for further analyses. Unless  
466 otherwise specified, all time-domain and spectral estimates were based on responses recorded  
467 between 400-1000ms following stimulus onset when signals were relatively more stationary.

#### 468 ***Spike-field coherence (SFC)***

469 To measure the extent of rhythmic synchronization between LFP and spike trains at all  
470 frequencies, we estimated spike-field coherence (SFC) defined as the squared magnitude of the  
471 cross-spectrum divided by the product of the auto-spectra<sup>69</sup>:

$$C(f) = \frac{|S_{xy}(f)|^2}{S_{xx}(f)S_{yy}(f)} \quad (1)$$

472 where  $C(f)$  denotes the spike-field coherence at frequency  $f$ ,  $S_{xy}(f)$  denotes the cross-spectral  
473 density function between spike train  $x$  and LFP signal  $y$ ,  $S_{xx}(f)$  and  $S_{yy}(f)$  are the respective  
474 autospectra. All spectral estimates were carried out using multi-taper method with  $K = 7$   
475 orthogonal Slepian tapers  $w_k$  to yield spectral smoothing of approximately  $\pm 4$  Hz at a frequency  
476 resolution of  $\sim 1$  Hz. This involved multiplying each data sequence  $\mathbf{x}_n$  ( $\mathbf{y}_n$  for LFP) with the  
477 different tapers to obtain  $K$  independent spectral estimates and then averaging them:

$$X_k^n(f) = \sum_{t=1}^T w_k(t) \cdot x_n(t) e^{-j2\pi ft}$$
$$S_{xx}(f) = \frac{1}{NK} \sum_{n=1}^N \sum_{k=1}^K X_k^n(f) \cdot X_k^{n*}(f)$$

478 where  $X_k^n(f)$  denotes the  $k^{\text{th}}$  Slepian-tapered Fourier transform of  $\mathbf{x}_n$ ,  $X_k^{n*}(f)$  its complex  
479 conjugate,  $N$  is the total number of trials, and  $T$  is the duration of the signals  $x$  and  $y$ .

#### 480 ***Significance test for SFC***

481 To test the statistical significance of SFC for each spike-LFP pair at every frequency, we  
482 obtained multiple estimates of SFCs by shuffling the order of the trials of spike trains thereby  
483 destroying the phase relationship between spike trains and LFPs. At any given frequency, the

484 estimated value of SFC before shuffling was deemed to be significant if the probability of  
485 drawing it from the distribution of shuffled SFC estimates was less than 0.01. Only those pairs  
486 which showed significant SFC at 8 consecutive bins (~8Hz) in the frequency range between 30-  
487 45 Hz in at least one of the stimulus conditions were considered for further analyses. We  
488 assessed the significance of difference in SFC across the two pairs of conditions by a shuffling  
489 procedure similar to the one described above. Trials from the two conditions to be tested were  
490 pooled together. Half the trials were then dubbed to be from one condition, while the other half  
491 were labeled to be from the other condition. SFCs were then estimated for the two conditions and  
492 the differences in SFCs were computed. This procedure was repeated several times and the true  
493 difference was compared against the distribution of 'fake' differences ( $p < 0.01$ ). A similar  
494 technique was used to assess significance of modulations in gamma-band LFP power. Statistical  
495 significance of firing rate changes were tested using two-sided Wilcoxon rank-sum test ( $p = 0.05$ )  
496 by comparing spike counts across trials for the relevant stimulus conditions.

### 497 **Modulation Indices**

498 Orientation and ocularity preferences were first determined for each neuron by estimating rate-  
499 modulation indices ( $M_R$ ) derived from the average firing rates ( $R$ ) elicited by the pair of stimuli:

$$M_R = \frac{R_A - R_B}{R_A + R_B} \quad (2)$$

500 Here  $A$  and  $B$  are used as placeholders to denote the pair of conditions that correspond to the  
501 presentation of, either the pair of orthogonal gratings to the neuron's preferred eye (orientation  
502 preference), or the preferred orientation to the right and left eye (ocularity preference). Similar  
503 definitions were used for quantifying modulations in the gamma-band LFP power ( $M_L$ ) and  
504 gamma-band spike-field coherence ( $M_C$ ). To explicitly test whether modulations in firing rate  
505 ( $M_R$ ) or LFP power ( $M_L$ ) better predicted modulations in neuronal synchrony ( $M_C$ ), we  
506 performed multiple linear regression  $M_C = \beta_R M_R + \beta_L M_L + \beta_0$  to determine coefficients  $\beta_R$  and  
507  $\beta_L$  on predictors  $M_R$  and  $M_L$  respectively, according to:

$$\boldsymbol{\beta} = (\mathbf{M}^T \mathbf{M})^{-1} (\mathbf{M}^T \mathbf{M}_C) \quad (3)$$

508 where  $\boldsymbol{\beta} = (\beta_R \ \beta_L \ \beta_0)^T$ , and  $\mathbf{M} = (\mathbf{M}_R \ \mathbf{M}_L \ \mathbf{1})$  where  $\mathbf{M}_R$  and  $\mathbf{M}_L$  denote vectors of  
509 modulation indices across the population. To compare the quality of predictions given by  $M_R$  and  
510  $M_L$ , we regressed  $M_C$  against  $M_R$  and  $M_L$  separately. The mean slopes of both regressions were  
511 used individually to generate predictions  $\widetilde{M}_C$ . For each spike-LFP pair, normalised residuals were  
512 then estimated by computing the squared deviation of the prediction from the experimental  
513 measurement  $M_C$ , normalized by the variance of the measurement:  $(\widetilde{M}_C - M_C)^2 / \langle (\delta M_C)^2 \rangle$ .

### 514 **Pseudo spike-field coherence**

515 In addition to assessing modulation of firing rates and SFC across conditions, we directly tested  
516 whether firing rates exhibited correlated variability with SFCs across trials within a given  
517 condition. This was done by calculating the Spearman correlation coefficient ( $\rho$ ) between spike  
518 count across trials and single-trial coherence estimates. Coherence estimates for individual trials  
519 were obtained through the following procedure<sup>5</sup>. For any given trial, the z-transform of the SFC  
520 estimated by leaving out that trial, was subtracted from the original z-transformed SFC estimate  
521 after weighting each term with the number of trials used in the estimate:

$$q_i(f) = N \cdot q(f) - (N - 1) q^i(f) \quad (4)$$

522 where  $q_i(f)$  denotes pseudo-coherence of the  $i^{th}$  trial,  $q(f)$  is the coherence across all  $N$  trials,  
523 and  $q^i(f)$  is coherence estimated by leaving the  $i^{th}$  trial out. Here  $q = \sqrt{-2(K-1) \log(1-C)}$   
524 denotes the z-transformed value of the estimated coherence  $C$  with  $K = 7$  tapers.

### 525 ***Spike-triggered LFP***

526 For each neuron, spike-triggered average (STA) of the LFP was estimated first by averaging  
527 300ms segments around the time of each spike emitted by that neuron. The result was divided by  
528 the standard deviation of the LFP to obtain normalised STA<sup>22</sup>. The peak amplitude of the  
529 normalised STA was taken as a measure of the correlation between LFP and neuronal membrane  
530 potential. To determine whether LFP was robustly correlated with the membrane potential across  
531 all stimulus conditions, normalised STAs were computed separately for each stimulus condition  
532 and their peak amplitudes were compared.

### 533 ***Correction procedures***

534 To ensure that our test statistics are not affected by differences in bias and variance across  
535 conditions, we took the following measures to avoid potential confounds in SFC estimation.  
536 Each condition included the same number of trials and the lengths of data segments in all trials  
537 were identical across conditions. For each single-unit, SFCs were calculated between its spike  
538 trains and concurrently recorded LFPs from all tetrodes. Consequently  $\sim 70\%$  of SFCs (275/400  
539 pairs) were obtained from spikes and LFPs belonging to different electrodes. Furthermore, when  
540 using spikes and LFP from the same electrode, a 4ms segment of LFP was removed around the  
541 time of each spike and those data points were replaced using cubic spline interpolation. This  
542 procedure resulted in a significant reduction of SFC, but only in the frequency range above 100  
543 Hz (**Supplementary Fig. 13**) implying that gamma-band SFC was not affected by spurious  
544 correlations between spikes and LFP. Therefore, we retained the spike-LFP pairs for which  
545 spikes and LFP were recorded on the same electrode in order to gain statistical power.

### 546 **M4 Neuronal model**

547 Rhythmic spiking process  $r(t)$  was modeled as a sum of asynchronous excitation  $A(t)$  with  
548 mean  $a$  and rhythmic input  $\psi(t)$  as described in the results. The net excitability due to  $\psi(t)$  is  
549 assumed to be zero, so the mean activity is given by  $\langle r(t) \rangle = \langle A(t) \rangle = a$ . Variability on the  
550 other hand, is inherited from both inputs according to:

$$\langle (\delta \mathbf{r})^2 \rangle_t = \langle (\delta \mathbf{A})^2 \rangle_t + g^2 \langle (\delta \Psi)^2 \rangle_t \quad (5)$$

551 where functions of time are denoted using boldface letters for convenience,  $g$  is the sensitivity to  
552 synchronous input, and subscript  $\langle \cdot \rangle_t$  denotes expectation over time. To estimate  $\langle (\delta \mathbf{r})^2 \rangle_t$ , we  
553 first time-shifted the spike train of each trial  $i$  by an amount  $\delta t_i$  so that gamma phases of the  
554 simultaneously recorded LFP traces were aligned across trials, and then computed the temporal  
555 variability of the trace obtained by averaging the resulting spike trains across trials  
556 (**Supplementary Fig. 7A** – top right). We isolated the component of variability due to rhythmic  
557 input by subtracting the asynchronous component  $\langle (\delta \mathbf{A})^2 \rangle_t$  from  $\langle (\delta \mathbf{r})^2 \rangle_t$ . The asynchronous  
558 component was estimated by a procedure in which elements of  $\{\delta t_i\}$  were shuffled before  
559 shifting the spike trains. This shuffling procedure essentially randomizes the phases of gamma  
560 cycles of different trials, so that any temporal variability in the resulting trial-averaged firing  
561 rates will be solely due to asynchronous dynamics of the spiking process (**Supplementary Fig.**  
562 **7A** – bottom left). The shuffling procedure was carried out several times and the mean of the

563 resulting distribution of variabilities  $\langle(\delta\mathbf{r})^2\rangle_t^{shuffled}$  was used as an estimate of  $\langle(\delta\mathbf{A})^2\rangle_t$ .  
564 Neuronal sensitivity  $g$  was then estimated according to:

$$g = \sqrt{\frac{\langle(\delta\mathbf{r})^2\rangle_t - \langle(\delta\mathbf{r})^2\rangle_t^{shuffled}}{\langle(\delta\Psi)^2\rangle_t}} \quad (6)$$

565 where  $\langle(\delta\mathbf{r})^2\rangle_t^{shuffled}$  denotes variability estimated through the shuffling procedure.

## 566 Acknowledgements

567 We would like to thank Drs. Jacob Macke, Philipp Berens, Esther Florin, and David Omer for  
568 comments on previous versions of the manuscript. This work was supported by the Max-Planck  
569 Society and the German Federal Ministry of Education and Research (BMBF; FKZ: 01GQ1002).

## 570 References

- 571 1. Shadlen, M. N. & Newsome, W. T. Noise, neural codes and cortical organization. *Curr.*  
572 *Opin. Neurobiol.* **4**, 569–579 (1994).
- 573 2. Eggermont, J. J. Is there a neural code? *Neurosci. Biobehav. Rev.* **22**, 355–370 (1998).
- 574 3. Butts, D. A. *et al.* Temporal precision in the neural code and the timescales of natural  
575 vision. *Nature* **449**, 92–95 (2007).
- 576 4. Panzeri, S., Brunel, N., Logothetis, N. K. & Kayser, C. Sensory neural codes using  
577 multiplexed temporal scales. *Trends Neurosci.* **33**, 111–120 (2010).
- 578 5. Womelsdorf, T., Fries, P., Mitra, P. P. & Desimone, R. Gamma-band synchronization in  
579 visual cortex predicts speed of change detection. *Nature* **439**, 733–736 (2006).
- 580 6. Vinck, M. *et al.* Gamma-phase shifting in awake monkey visual cortex. *J. Neurosci.* **30**,  
581 1250–7 (2010).
- 582 7. Sridharan, D., Boahen, K. & Knudsen, E. I. Space coding by gamma oscillations in the  
583 barn owl optic tectum. *J. Neurophysiol.* **105**, 2005–2017 (2011).
- 584 8. Fries, P., Reynolds, J. H., Rorie, A. E. & Desimone, R. Modulation of Oscillatory  
585 Neuronal Synchronization by Selective Visual Attention. *Science (80-. )*. **291**, 1560–1563  
586 (2001).
- 587 9. Lakatos, P., Karmos, G., Mehta, A. D., Ulbert, I. & Schroeder, C. E. Entrainment of  
588 neuronal oscillations as a mechanism of attentional selection. *Science* **320**, 110–3 (2008).
- 589 10. Fries, P., Roelfsema, P. R., Engel, A. K., König, P. & Singer, W. Synchronization of  
590 oscillatory responses in visual cortex correlates with perception in interocular rivalry.  
591 *Proc. Natl. Acad. Sci. U. S. A.* **94**, 12699–12704 (1997).
- 592 11. Fries, P., Jan-Hinrich, Roelfsema, P. R., Singer, W. & Engel, A. K. Oscillatory neuronal  
593 synchronization in primary visual cortex as a correlate of stimulus selection. *J. Neurosci.*  
594 **22**, 3739–3754 (2002).
- 595 12. Pesaran, B., Pezaris, J. S., Sahani, M., Mitra, P. P. & Andersen, R. A. Temporal structure  
596 in neuronal activity during working memory in Macaque parietal cortex. *Nature* **8336**,  
597 805–811 (2002).
- 598 13. Colgin, L. L. & Moser, E. I. Gamma oscillations in the hippocampus. *Physiol. Bethesda*  
599 *Md* **25**, 319–329 (2010).
- 600 14. Hammond, C., Bergman, H. & Brown, P. Pathological synchronization in Parkinson's  
601 disease: networks, models and treatments. *Trends Neurosci.* **30**, 357–364 (2007).
- 602 15. Gonzalez-Burgos, G. & Lewis, D. A. GABA Neurons and the Mechanisms of Network

- 603 Oscillations: Implications for Understanding Cortical Dysfunction in Schizophrenia.  
604 *Schizophr. Bull.* **34**, 944–961 (2008).
- 605 16. Bartos, M., Vida, I. & Jonas, P. Synaptic mechanisms of synchronized gamma oscillations  
606 in inhibitory interneuron networks. *Nat. Rev. Neurosci.* **8**, 45–56 (2007).
- 607 17. Buzsáki, G. & Wang, X.-J. Mechanisms of gamma oscillations. *Annu. Rev. Neurosci.* **35**,  
608 203–225 (2012).
- 609 18. Einevoll, G. T., Kayser, C., Logothetis, N. K. & Panzeri, S. Modelling and analysis of  
610 local field potentials for studying the function of cortical circuits. *Nat. Rev. Neurosci.* **14**,  
611 770–85 (2013).
- 612 19. Buzsáki, G., Anastassiou, C. A. & Koch, C. The origin of extracellular fields and currents  
613 — EEG, ECoG, LFP and spikes. *Nat. Rev. Neurosci.* **13**, 407–420 (2012).
- 614 20. Haider, B., Schulz, D. P. P. A., Häusser, M. & Carandini, M. Millisecond Coupling of  
615 Local Field Potentials to Synaptic Currents in the Awake Visual Cortex. *Neuron* **90**, 35–  
616 42 (2016).
- 617 21. Berens, P., Keliris, G. A., Ecker, A. S., Logothetis, N. K. & Tolias, A. S. Comparing the  
618 Feature Selectivity of the Gamma-Band of the Local Field Potential and the Underlying  
619 Spiking Activity in Primate Visual Cortex. *Front. Syst. Neurosci.* **2**, 11 (2008).
- 620 22. Okun, M., Naim, A. & Lampl, I. The subthreshold relation between cortical local field  
621 potential and neuronal firing unveiled by intracellular recordings in awake rats. *J.*  
622 *Neurosci.* **30**, 4440–4448 (2010).
- 623 23. Riehle, A., Grün, S., Diesmann, M. & Aertsen, A. Spike synchronization and rate  
624 modulation differentially involved in motor cortical function. *Science* **278**, 1950–1953  
625 (1997).
- 626 24. Biederlack, J. *et al.* Brightness Induction: Rate Enhancement and Neuronal  
627 Synchronization as Complementary Codes. *Neuron* **52**, 1073–1083 (2006).
- 628 25. Li, A., Gire, D. H. & Restrepo, D. Spike-Field Coherence in a Population of Olfactory  
629 Bulb Neurons Differentiates between Odors Irrespective of Associated Outcome. *J.*  
630 *Neurosci.* **35**, 5808–5822 (2015).
- 631 26. Niessing, J. *et al.* Hemodynamic signals correlate tightly with synchronized gamma  
632 oscillations. *Science* **309**, 948–951 (2005).
- 633 27. Viswanathan, A. & Freeman, R. D. Neurometabolic coupling in cerebral cortex reflects  
634 synaptic more than spiking activity. *Nat. Neurosci.* **10**, 1308–1312 (2007).
- 635 28. Markowitz, D. A., Collman, F., Brody, C. D., Hopfield, J. J. & Tank, D. W. Rate-specific  
636 synchrony: using noisy oscillations to detect equally active neurons. *Proc. Natl. Acad. Sci.*  
637 *U. S. A.* **105**, 8422–8427 (2008).
- 638 29. Jia, X., Smith, M. A. & Kohn, A. Stimulus selectivity and spatial coherence of gamma  
639 components of the local field potential. *J. Neurosci.* **31**, 9390–9403 (2011).
- 640 30. Jia, X., Tanabe, S. & Kohn, A. Gamma and the coordination of spiking activity in early  
641 visual cortex. *Neuron* **77**, 762–74 (2013).
- 642 31. Bartfeld, E. & Grinvald, A. Relationships between orientation-preference pinwheels,  
643 cytochrome oxidase blobs, and ocular-dominance columns in primate striate cortex. *Proc.*  
644 *Natl. Acad. Sci. U. S. A.* **89**, 11905–9 (1992).
- 645 32. Blasdel, G. G. Differential Imaging of Ocular Dominance and Orientation Selectivity in  
646 Monkey Striate Cortex. *J. Neurosci.* **12**, 3115–38 (1992).
- 647 33. Azouz, R. & Gray, C. M. Dynamic spike threshold reveals a mechanism for synaptic  
648 coincidence detection in cortical neurons in vivo. *Proc. Natl. Acad. Sci. U. S. A.* **97**, 8110–

- 649 8115 (2000).
- 650 34. Henze, D. A. & Buzsáki, G. Action potential threshold of hippocampal pyramidal cells in  
651 vivo is increased by recent spiking activity. *Neuroscience* **105**, 121–130 (2001).
- 652 35. Azouz, R. & Gray, C. M. Adaptive coincidence detection and dynamic gain control in  
653 visual cortical neurons in vivo. *Neuron* **37**, 513–523 (2003).
- 654 36. Wilent, W. B. & Contreras, D. Stimulus-dependent changes in spike threshold enhance  
655 feature selectivity in rat barrel cortex neurons. *J. Neurosci.* **25**, 2983–2991 (2005).
- 656 37. Cardin, J. A., Kumbhani, R. D., Contreras, D. & Palmer, L. A. Cellular mechanisms of  
657 temporal sensitivity in visual cortex neurons. *J. Neurosci.* **30**, 3652–3662 (2010).
- 658 38. Bernander, O., Douglas, R. J., Martin, K. A. & Koch, C. Synaptic background activity  
659 influences spatiotemporal integration in single pyramidal cells. *Proc. Natl. Acad. Sci. U.*  
660 *S. A.* **88**, 11569–11573 (1991).
- 661 39. Marsálek, P., Koch, C. & Maunsell, J. On the relationship between synaptic input and  
662 spike output jitter in individual neurons. *Proc. Natl. Acad. Sci. U. S. A.* **94**, 735–740  
663 (1997).
- 664 40. Rudolph, M. & Destexhe, A. Tuning neocortical pyramidal neurons between integrators  
665 and coincidence detectors. *J. Comput. Neurosci.* **14**, 239–251 (2003).
- 666 41. Prescott, S. A., Ratté, S., De Koninck, Y. & Sejnowski, T. J. Nonlinear interaction  
667 between shunting and adaptation controls a switch between integration and coincidence  
668 detection in pyramidal neurons. *J. Neurosci.* **26**, 9084–9097 (2006).
- 669 42. Ratte, S., Hong, S., DeSchutter, E. & Prescott, S. A. Impact of neuronal properties on  
670 network coding: Roles of spike initiation dynamics and robust synchrony transfer. *Neuron*  
671 **78**, 758–772 (2013).
- 672 43. Perrenoud, Q., Pennartz, C. M. A. & Gentet, L. J. Membrane Potential Dynamics of  
673 Spontaneous and Visually Evoked Gamma Activity in V1 of Awake Mice. *PLoS Biol.* **14**,  
674 (2016).
- 675 44. Ray, S., Ni, A. M. & Maunsell, J. H. R. Strength of Gamma Rhythm Depends on  
676 Normalization. *PLoS Biol.* **11**, (2013).
- 677 45. Ray, S., Crone, N. E., Niebur, E., Franaszczuk, P. J. & Hsiao, S. S. Neural correlates of  
678 high-gamma oscillations (60–200 Hz) in macaque local field potentials and their potential  
679 implications in electrocorticography. *J. Neurosci.* **28**, 11526–11536 (2008).
- 680 46. Fries, P., Womelsdorf, T., Oostenveld, R. & Desimone, R. The effects of visual  
681 stimulation and selective visual attention on rhythmic neuronal synchronization in  
682 macaque area V4. *J. Neurosci.* **28**, 4823–4835 (2008).
- 683 47. Lepage, K. & Kramer, M. Dependence of Spike-Field Coherence on expected intensity.  
684 *Neural Comput.* (2011).
- 685 48. Lepage, K. Q. *et al.* A procedure for testing across-condition rhythmic spike-field  
686 association change. *J Neurosci Methods* **213**, 43–62 (2013).
- 687 49. De La Rocha, J., Doiron, B., Shea-Brown, E., Josić, K. & Reyes, A. Correlation between  
688 neural spike trains increases with firing rate. *Nature* **448**, 802–806 (2007).
- 689 50. Chalk, M. *et al.* Attention Reduces Stimulus-Driven Gamma Frequency Oscillations and  
690 Spike Field Coherence in V1. *Neuron* **66**, 114–125 (2010).
- 691 51. Wang, Y., Iliescu, B. F., Ma, J., Josic, K. & Dragoi, V. Adaptive changes in neuronal  
692 synchronization in macaque v4. *J. Neurosci.* **31**, 13204–13213 (2011).
- 693 52. Ray, S. & Maunsell, J. H. R. Differences in Gamma Frequencies across Visual Cortex  
694 Restrict Their Possible Use in Computation. *Neuron* **67**, 885–896 (2010).

- 695 53. Salinas, E. & Sejnowski, T. J. Correlated neuronal activity and the flow of neural  
696 information. *Nat. Rev. Neurosci.* **2**, 539–50 (2001).
- 697 54. Izhikevich, E. M., Desai, N. S., Walcott, E. C. & Hoppensteadt, F. C. Bursts as a unit of  
698 neural information: Selective communication via resonance. *Trends Neurosci.* **26**, 161–  
699 167 (2003).
- 700 55. König, P., Engel, A. K., Roelfsema, P. R. & Singer, W. How precise is neuronal  
701 synchronization? *Neural Comput.* **7**, 469–485 (1995).
- 702 56. Sejnowski, T. J. & Paulsen, O. Network oscillations: emerging computational principles.  
703 *J. Neurosci.* **26**, 1673–1676 (2006).
- 704 57. Fries, P., Nikolić, D. & Singer, W. The gamma cycle. *Trends Neurosci.* **30**, 309–316  
705 (2007).
- 706 58. Fries, P. A mechanism for cognitive dynamics: neuronal communication through neuronal  
707 coherence. *Trends Cogn. Sci.* **9**, 474–80 (2005).
- 708 59. Womelsdorf, T. *et al.* Modulation of neuronal interactions through neuronal  
709 synchronization. *Science* **316**, 1609–12 (2007).
- 710 60. Colgin, L. L. *et al.* Frequency of gamma oscillations routes flow of information in the  
711 hippocampus. *Nature* **462**, 353–357 (2009).
- 712 61. Wespapat, V., Tennigkeit, F. & Singer, W. Phase sensitivity of synaptic modifications in  
713 oscillating cells of rat visual cortex. *J. Neurosci.* **24**, 9067–9075 (2004).
- 714 62. Buzsáki, G. *Rhythms of the Brain. Rhythm. Brain* **1**, (Oxford Univ. Press, 2006).
- 715 63. Keliris, G. A., Logothetis, N. K. & Tolias, A. S. The role of the primary visual cortex in  
716 perceptual suppression of salient visual stimuli. *J. Neurosci.* **30**, 12353–12365 (2010).
- 717 64. Logothetis, N. K., Guggenberger, H., Peled, S. & Pauls, J. Functional imaging of the  
718 monkey brain. *Nat. Neurosci.* **2**, 555–562 (1999).
- 719 65. Logothetis, N. K., Merkle, H., Augath, M., Trinath, T. & Ugurbil, K. Ultra-High  
720 Resolution fMRI in Monkeys with Implanted RF Coils. *J Neurosci Methods* **35**, 227–242  
721 (2002).
- 722 66. Tolias, A. S. *et al.* Recording chronically from the same neurons in awake, behaving  
723 primates. *J. Neurophysiol.* **98**, 3780–90 (2007).
- 724 67. Ecker, A. S. *et al.* Decorrelated neuronal firing in cortical microcircuits. *Science* **327**,  
725 584–587 (2010).
- 726 68. Weatherall report. The use of non-human primates in research. 1–153 (2006).
- 727 69. Bendat, J. S. & Piersol, A. G. *Random data. Consultant* (Wiley, 1986).
- 728
